# Supplementary material
Source: MDPI journal article supplement (https://www.mdpi.com/2071-1050/12/19/8066)
Supplement: s1 [file s1]

**SM Table 1 Description of sampling points.**

| Number | Location                  | Description                                                                                                                                                                                                              |
|--------|---------------------------|--------------------------------------------------------------------------------------------------------------------------------------------------------------------------------------------------------------------------|
| 1      | 51°11'13.9"N 16°06'21.8"E | In the middle of the forest, about 350 m northwest from the commonly used road (provincial road number 364; about 9000 motor vehicles per day)                                                                           |
| 2      | 51°11'25.7"N 16°06'51.7"E | About 100 m west from the metallurgical company, in close vicinity of railroad tracks, 350 m northwest from commonly used road (provincial road number 364; about 9000 motor vehicles per day),                          |
| 3*     | 51°11'39.6"N 16°06'27.4"E | Next to the forest road, 300 m south from express national road S3 (about 15000 motor vehicles/day)                                                                                                                      |
| 4      | 51°11'26.8"N 16°05'51.1"E | In the forest, located next to farmlands, 300 m south from express national road S3                                                                                                                                      |
| 5*     | 51°11'07.7"N 16°05'56.3"E | In the vicinity of railroad tracks, about 350 m northwest from the commonly used road (provincial road number 364; about 9000 motor vehicles per day)                                                                    |
| 6      | 51°10'36.8"N 16°07'08.3"E | Close to mining part of the smelter, on the outskirts of the forest, no commonly used roads nearby                                                                                                                       |
| 7      | 51°10'53.1"N 16°07'35.7"E | Middle of the forest, hardly passable roads with no residential buildings nearby                                                                                                                                         |
| 8      | 51°11'01.3"N 16°07'37.7"E | On the outskirts of the forest, about 200 m from the smelter, next to forest road with almost no traffic                                                                                                                 |
| 9      | 51°11'11.0"N 16°07'53.7"E | On the outskirts of the forest, next to forest road with almost no traffic                                                                                                                                               |
| 10     | 51°11'24.7"N 16°07'37.3"E | In the closest vicinity of smelter (next to its border), 150 m southeast from provincial road number 364 (with about 9000 motor vehicles per day) and 250 m southwest from national road number 3 (about 12000 cars/day) |

All the lichens and spider webs samples were located on branches of trees, far from residential houses

\*In these points only samples of lichens were collected, samples of spider webs were destroyed
